# Supplementary material for: Regulation of Transcriptional Activity of Merkel Cell Polyomavirus Large T-Antigen by PKA-Mediated Phosphorylation
Source: MDPI journal article supplement (doi:10.3390/ijms24010895), 2023-01-03
Supplement: s1 [file s1]

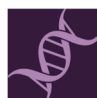

Supplementary figures and tables

# Regulation of Transcriptional Activity of Merkel Cell Polyomavirus Large T-Antigen by PKA-Mediated Phosphorylation

Mar Falquet <sup>1</sup>, Carla Prezioso <sup>2,3</sup>, Maria Ludvigsen <sup>1</sup>, Jack-Ansgar Bruun <sup>4</sup>, Sara Passerini <sup>3</sup>,  
Baldur Sveinbjörnsson <sup>1,5</sup>, Valeria Pietropaolo <sup>3,\*</sup> and Ugo Moens <sup>2,\*</sup>

<sup>1</sup> Molecular Inflammation Research Group, Department of Medical Biology, University of Tromsø-The Arctic University of Norway, 9037 Tromsø, Norway

<sup>2</sup> Microbiology of Chronic Neuro-Degenerative Pathologies, IRCCS San Raffaele, 00163 Rome, Italy

<sup>3</sup> Department of Public Health and Infectious Diseases, Sapienza University of Rome, 00185 Rome, Italy

<sup>4</sup> Department of Medical Biology, Proteomics Platform, University of Tromsø-The Arctic University of Norway, 9037 Tromsø, Norway

<sup>5</sup> Childhood Cancer Research Unit, Department of Women's and Children's Health, Karolinska Institute, 17177 Stockholm, Sweden

\* Correspondence: valeria.pietropaolo@uniroma1.it (V.P.); ugo.moens@uit.no (U.M.)

† These authors contributed equally to this work.

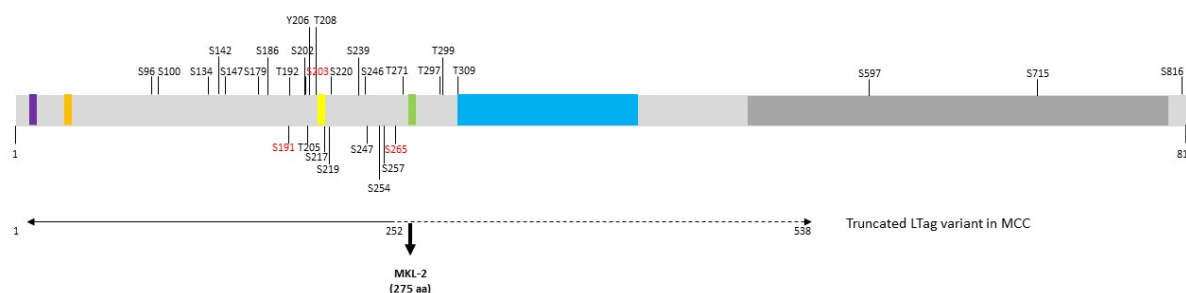

**Figure S1.** Proven and putative phosphorylation sites in MCPyV large T antigen. The functional domains of large T-antigen are shown in different colors: constant region 1 in purple (residues 13–17, LCKLL); DnaJ motif in orange (residues 42–48, HPDKGGN); retinoblastoma binding motif in yellow (residues 212–216, LFCDE); nuclear localization signal in green (residues 277–280, RKRK); origin binding domain in light blue (residues 308–433); helicase domain in dark grey). Truncated large T-antigen sequenced from Merkel cell carcinomas so far vary in length from 252 amino acids (JPN MCC74; BAO04662) to 538 amino acids (KIP1; AHN13646). A premature stop codon in MKL-2 indicated by the arrow results in a truncated large T-antigen that spans the N-terminal 275 residues.

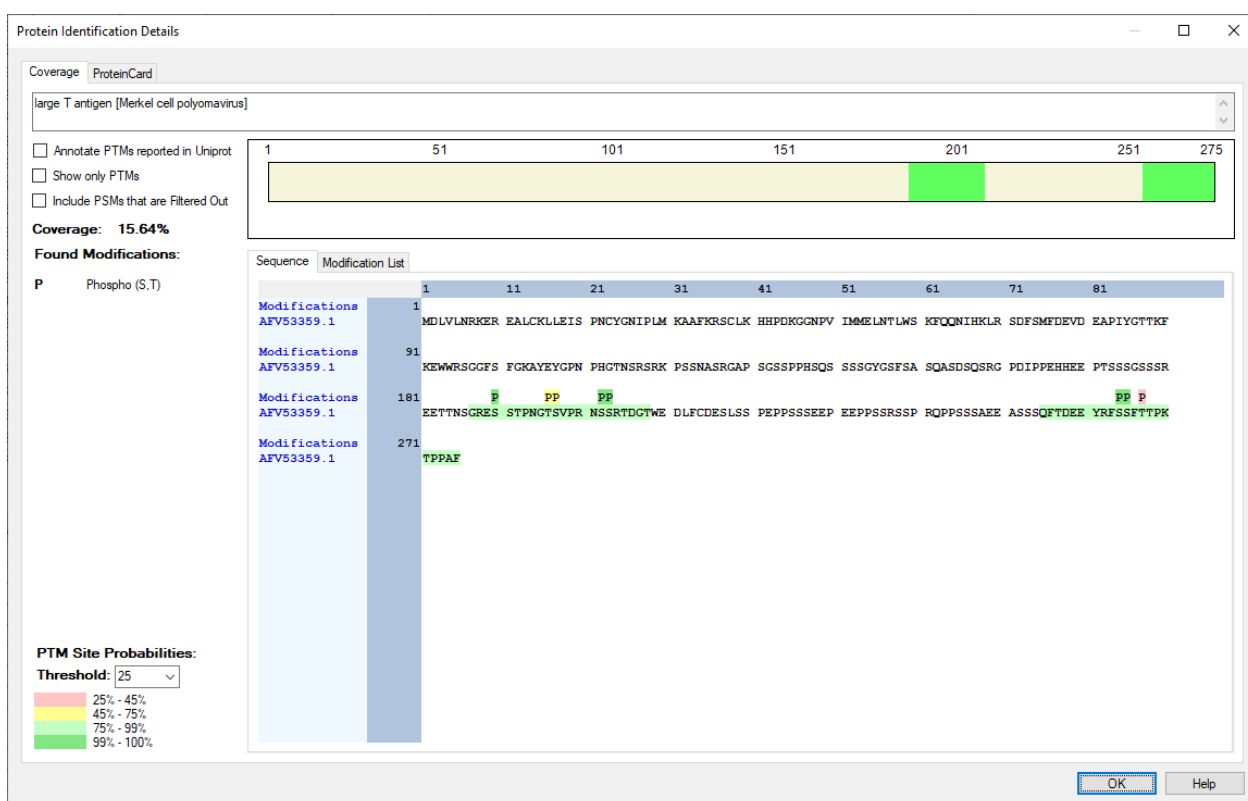

**Figure S2.** Phosphorylation sites detected by mass spectrometry of in vitro PKA phosphorylated peptides. The method does not allow distinction between phosphorylation of S202 and/or S203 (resp. S264 and/or S265).

**A**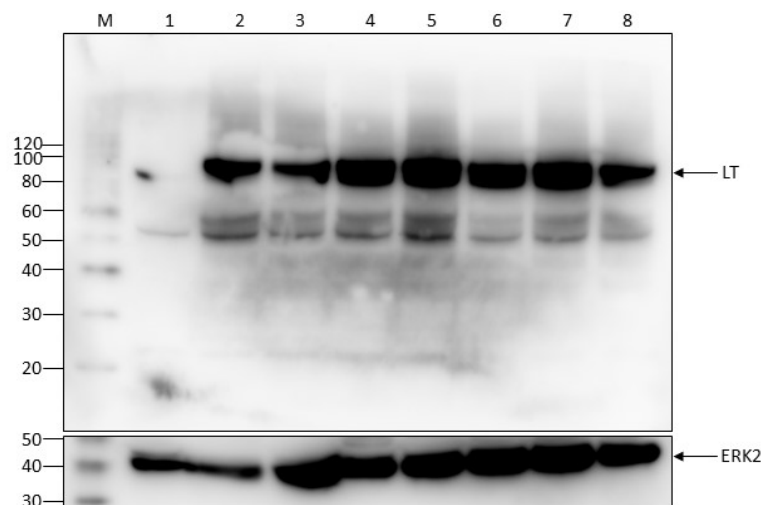**B**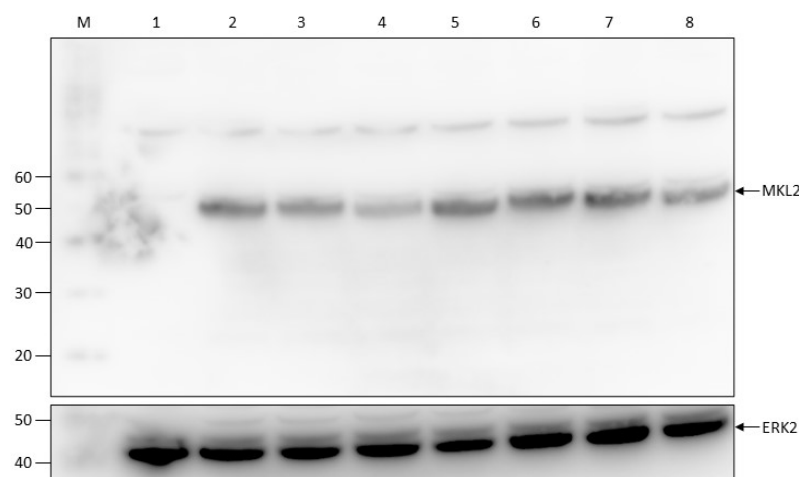

**Figure S3.** Expression levels of LTag, MKL2 LTag and their single mutants. **(A)** HEK293 cells were transfected with 1 mg empty expression vector (lane 1) or 1 mg of expression vector for respectively LT (lane 2), LT-S91A (lane 3), LT-S191D (lane 4), LT-S203A (lane 5), LT-S203D (lane 6), LT-S265A (lane 7) or LT-S265D (lane 8). **(B)** as A, but empty expression vector (lane 1), MKL2 (lane 2), MKL2-S91A (lane 3), MKL2-S191D (lane 4), MKL2-S203A (lane 5), MKL2-S203D (lane 6), MKL2-S265A (lane 7) or MKL2-S265D (lane 8). Lane M: protein marker (in kDa). ERK2 was used as a loading control.

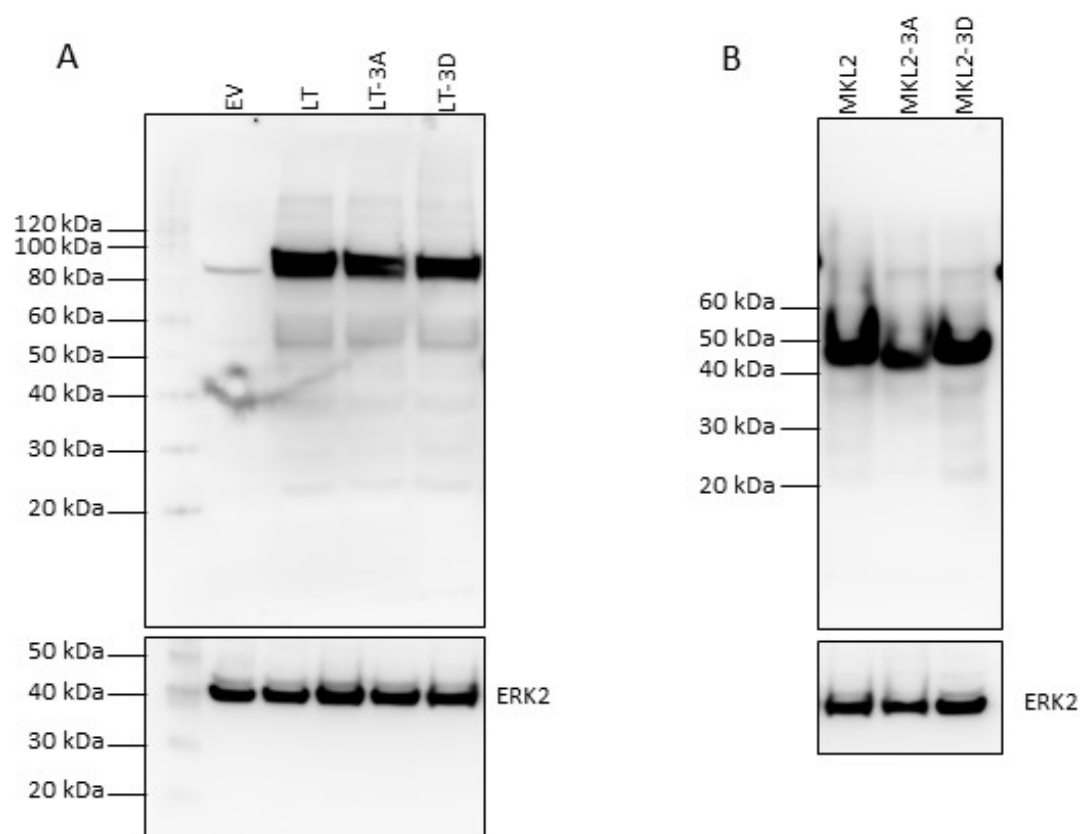

**Figure S4.** Expression levels of LTag, MKL2 LTag and their triple mutants. **(A)** HEK293 cells were transfected with empty expression vector (EV) or expression plasmids for MCPyV LTag, LT-3A, LT-3D and protein levels were determined by western blot. **(B)** as panel A but cells were transfected with expression plasmids for MKL2 tLT, MKL2-3A or MKL2-3D. ERK2 was used as a loading control. The protein size marker (in kDa) is shown.

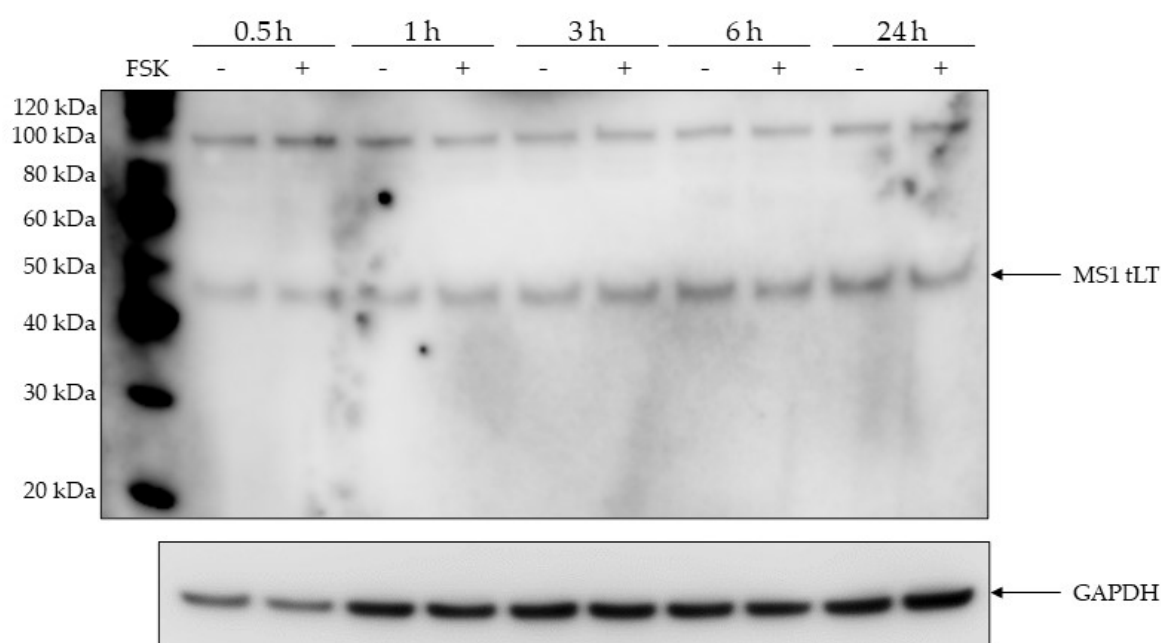

**Figure S5.** Activation of the PKA pathway does not increase the levels of MS1 LTag. Serum-starved MS1 cells were stimulated with 10  $\mu$ M forskolin (FSK) for the indicated time points and levels of MS1 LT was monitored by western blotting using CM2B4 antibody. GAPDH was used as a loading control. The molecular marker (in kDa) is shown. The absence (-) or presence (+) of forskolin is indicated.

**Table S1.** Biological consequences of mutations in putative phosphoacceptor sites of MCPyV full-length (fl-LT) or truncated large T-antigen (tLT).

| Mutation             | fl-LT or tLT     | Protein kinase  | Effect                                                                                                                                                                                  | Reference  |
|----------------------|------------------|-----------------|-----------------------------------------------------------------------------------------------------------------------------------------------------------------------------------------|------------|
| S96A                 | fl-LT            | ND              | no effect on half-life                                                                                                                                                                  | [1]        |
| S134A                | fl-LT            | ND              | no effect on half-life                                                                                                                                                                  | [1]        |
| S142A                | fl-LT            | ND              | increased half-life and reduced interaction with b-TrCP                                                                                                                                 | [2]        |
| S147A                | fl-LT            | ND              | increased half-life; similar to wild-type LT, this mutant was unable to stimulate viral DNA replication; no effect on early and late promoter activity; reduced interaction with b-TrCP | [1]<br>[2] |
| S179A                | fl-LT            | ND              | no effect on half-life                                                                                                                                                                  | [1]        |
| S186A                | fl-LT            | ND              | no effect on half-life                                                                                                                                                                  | [1]        |
| T192A/E <sup>a</sup> | tLT <sup>b</sup> | ND <sup>c</sup> | no effect on growth of MKL1 MCC cells; no effect on half-life                                                                                                                           | [3]<br>[1] |
| S202A/E              | tLT              | ND              | no effect on growth of MKL1 MCC cells                                                                                                                                                   | [3]        |
| S203A/E              | tLT              | ND              | no effect on growth of MKL1 MCC cells                                                                                                                                                   | [3]        |
| T205A/E              | tLT<br>fl-LT     | ND<br>ND        | no effect on growth of MKL1 MCC cells; T205A: no effect on hVam6p binding                                                                                                               | [3]<br>[4] |
| Y206A                | fl-LT            | ND              | no effect on hVam6p binding                                                                                                                                                             | [4]        |
| T208A                | fl-LT            | ND              | no effect on hVam6p binding                                                                                                                                                             | [4]        |
| S217A/E              | tLT              | ND              | no effect on growth of MKL1 MCC cells                                                                                                                                                   | [3]        |
| S219A/E              | tLT              | ND              | S219A, but not S219E partially inhibited growth of MKL1 MCC cells <sup>d</sup>                                                                                                          | [3]        |

|                                     |                  |                  |                                                                                                                                                                                                                   |
|-------------------------------------|------------------|------------------|-------------------------------------------------------------------------------------------------------------------------------------------------------------------------------------------------------------------|
| S220A/E                             | tLT              | ND               | S220A, but not S220E inhibited growth of MKL1 MCC cells <sup>c</sup> ; S220A impaired pRb binding and induction of E2F target genes; [3]                                                                          |
|                                     |                  |                  | S220A: increase half-life and LT-dependent replication compared to wild-type LT; activation early and late promoter of an unmutated NCCR, but same activity as wild-type LT for a replication-deficient NCCR; [1] |
|                                     |                  |                  | S220A: reduced interaction with Skp2 [5]                                                                                                                                                                          |
| S239A/E                             | tLT              | ND               | no effect on growth of MKL1 MCC cells; [3]                                                                                                                                                                        |
|                                     |                  |                  | S293A: increase half-life and LT-dependent replication compared to wild-type LT; activation early and late promoter of an unmutated NCCR, but same activity as wild-type LT for a replication-deficient NCCR; [1] |
|                                     |                  |                  | S239A: reduced interaction with Fbw7 [2]                                                                                                                                                                          |
| S246A/S247A/S254A/T257A/S265A/T271A | tLT <sup>f</sup> | ND               | no effect on nuclear import [3]                                                                                                                                                                                   |
| S268A                               | fl-LT            | ND               | no effect on half-life [1]                                                                                                                                                                                        |
| T271A                               | fl-LT            | ND               | no effect on ORI binding and replication of viral DNA; [6]                                                                                                                                                        |
|                                     |                  |                  | no effect on half-life [1]                                                                                                                                                                                        |
| T297A                               | fl-LT            | ND               | increased ORI binding and replication of viral DNA [6]                                                                                                                                                            |
| T299A                               |                  |                  | reduced ORI binding and replication of viral DNA; [6]                                                                                                                                                             |
|                                     |                  |                  | no effect on half-life [1]                                                                                                                                                                                        |
| T309A                               | fl-LT            | ND               | no effect on half-life [1]                                                                                                                                                                                        |
| S597A                               | fl-LT            | ND               | no effect on half-life [1]                                                                                                                                                                                        |
| S715A                               | fl-LT            | ND               | no effect on half-life [1]                                                                                                                                                                                        |
| S816A                               | fl-LT            | ATM <sup>g</sup> | partially reverse inhibition of C33A cells growth compared to wild-type fl-LT; reduced apoptosis; [7]                                                                                                             |
|                                     |                  |                  | no effect on half-life [1]                                                                                                                                                                                        |

<sup>a</sup> Both nonphosphorylatable A and phosphomimicking E mutants were tested; <sup>b</sup> N-terminal 278 amino acids; <sup>c</sup> not done; <sup>d</sup> 20% inhibition after 18 days; <sup>e</sup> 60% inhibition after 18 days; <sup>f</sup> N-terminal 334 amino acids; <sup>g</sup> ataxia-telangiectasia mutated.

Table S2. Results mass spectrometry of PKA-phosphorylated peptides.

| Annotated Sequence<br>in large T antigen<br>[Merkel cell polyomavirus] | Modifications            | Modification<br>Pattern       | # Isoforms<br># Protein Groups<br># Proteins<br># PSMs | Master<br>Protein<br>Accessions | Positions<br>in Master<br>Proteins | Modifications<br>in Master Proteins  | # Missed Cleavages | Theo.<br>MH+ [Da] | Confidence<br>(by Search Engine):<br>Sequest HT | XCorr (by Search Engine):<br>Sequest HT | Sequence<br>in Protein   | Positions<br>in Proteins |
|------------------------------------------------------------------------|--------------------------|-------------------------------|--------------------------------------------------------|---------------------------------|------------------------------------|--------------------------------------|--------------------|-------------------|-------------------------------------------------|-----------------------------------------|--------------------------|--------------------------|
| [T].DEEYRFSSFTTPKTPPAF.[-]                                             |                          | -----                         | 1 1 1 1                                                | AFV53359.1                      | AFV53359.1<br>[258-275]            |                                      | 0                  | 2119.99711        | High                                            | 3.14                                    | T.DEEYRFSSFTTPKTPPAF.-   | [258-275]                |
| [D].EEYRFSSFTTPKTPPAF.[-]                                              |                          | -----                         | 1 1 1 5                                                | AFV53359.1                      | AFV53359.1<br>[259-275]            |                                      | 0                  | 2004.97017        | High                                            | 4.33                                    | D.EEYRFSSFTTPKTPPAF.-    | [259-275]                |
| [E].EYRFSSFTTPKTPPAF.[-]                                               |                          | -----                         | 1 1 1 6                                                | AFV53359.1                      | AFV53359.1<br>[260-275]            |                                      | 0                  | 1875.92758        | High                                            | 3.72                                    | E.EYRFSSFTTPKTPPAF.-     | [260-275]                |
| [E].EYRFSSFTTPKTPPAF.[-]                                               | 1xPhospho<br>[S6(98.4)]  | ----*-----                    | 3 1 1 7                                                | AFV53359.1                      | AFV53359.1<br>[260-275]            | AFV53359.1<br>1xPhospho [S265(99)]   | 0                  | 1955.89391        | High                                            | 2.79                                    | E.EYRFSSFTTPKTPPAF.-     | [260-275]                |
| [E].EYRFSSFTTPKTPPAF.[-]                                               | 1xPhospho<br>[S5(98.7)]  | ----*-----                    | 3 1 1 8                                                | AFV53359.1                      | AFV53359.1<br>[260-275]            | AFV53359.1<br>1xPhospho [S264(99.5)] | 0                  | 1955.89391        | High                                            | 4.05                                    | E.EYRFSSFTTPKTPPAF.-     | [260-275]                |
| [E].EYRFSSFTTPKTPPAF.[-]                                               | 1xPhospho [S/T/Y]        | positions not distinguishable | 3 1 1 3                                                | AFV53359.1                      | AFV53359.1<br>[260-275]            |                                      | 0                  | 1955.89391        | High                                            | 2.7                                     | E.EYRFSSFTTPKTPPAF.-     | [260-275]                |
| [Q].FTDEEYRFSSFTTPKTPPAF.[-]                                           |                          | -----                         | 1 1 1 5                                                | AFV53359.1                      | AFV53359.1<br>[256-275]            |                                      | 0                  | 2368.1132         | High                                            | 4.71                                    | Q.FTDEEYRFSSFTTPKTPPAF.- | [256-275]                |
| [S].GRESSTPNGTSVPR.[N]                                                 |                          | -----                         | 1 1 1 3                                                | AFV53359.1                      | AFV53359.1<br>[187-200]            |                                      | 0                  | 1444.71389        | High                                            | 4.11                                    | S.GRESSTPNGTSVPR.N       | [187-200]                |
| [S].GRESSTPNGTSVPRN.[S]                                                |                          | -----                         | 1 1 1 1                                                | AFV53359.1                      | AFV53359.1<br>[187-201]            |                                      | 0                  | 1558.75682        | High                                            | 3.05                                    | S.GRESSTPNGTSVPRN.S      | [187-201]                |
| [S].GRESSTPNGTSVPRN.[S]                                                | 1xPhospho<br>[S4(99.4)]  | ---*-----                     | 1 1 1 2                                                | AFV53359.1                      | AFV53359.1<br>[187-201]            | AFV53359.1<br>1xPhospho [S190(99.4)] | 0                  | 1638.72315        | High                                            | 3.07                                    | S.GRESSTPNGTSVPRN.S      | [187-201]                |
| [S].GRESSTPNGTSVPRNS.[S]                                               |                          | -----                         | 1 1 1 3                                                | AFV53359.1                      | AFV53359.1<br>[187-202]            |                                      | 0                  | 1645.78885        | High                                            | 3.53                                    | S.GRESSTPNGTSVPRNS.S     | [187-202]                |
| [S].GRESSTPNGTSVPRNS.[S]                                               | 1xPhospho<br>[S4(99.4)]  | ---*-----                     | 1 1 1 2                                                | AFV53359.1                      | AFV53359.1<br>[187-202]            | AFV53359.1<br>1xPhospho [S190(99.4)] | 0                  | 1725.75518        | High                                            | 2.71                                    | S.GRESSTPNGTSVPRNS.S     | [187-202]                |
| [S].GRESSTPNGTSVPRNSS.[R]                                              |                          | -----                         | 1 1 1 1                                                | AFV53359.1                      | AFV53359.1<br>[187-203]            |                                      | 0                  | 1732.82088        | High                                            | 2.87                                    | S.GRESSTPNGTSVPRNSS.R    | [187-203]                |
| [S].GRESSTPNGTSVPRNSSRTD.[G]                                           |                          | -----                         | 1 1 1 6                                                | AFV53359.1                      | AFV53359.1<br>[187-206]            |                                      | 0                  | 2104.99661        | High                                            | 4.56                                    | S.GRESSTPNGTSVPRNSSRTD.G | [187-206]                |
| [S].GRESSTPNGTSVPRNSSRTD.[G]                                           | 1xPhospho<br>[S17(99.2)] | -----*---                     | 2 1 1 3                                                | AFV53359.1                      | AFV53359.1<br>[187-206]            | AFV53359.1<br>1xPhospho [S203(99.2)] | 0                  | 2184.96294        | High                                            | 3.93                                    | S.GRESSTPNGTSVPRNSSRTD.G | [187-206]                |
| [S].GRESSTPNGTSVPRNSSRTD.[G]                                           | 1xPhospho<br>[S16(99.4)] | -----*---                     | 2 1 1 2                                                | AFV53359.1                      | AFV53359.1<br>[187-206]            | AFV53359.1<br>1xPhospho [S202(99.4)] | 0                  | 2184.96294        | High                                            | 4.38                                    | S.GRESSTPNGTSVPRNSSRTD.G | [187-206]                |

| Annotated Sequence<br>in large T antigen<br>[Merkel cell polyomavirus] | Modifications           | Modification<br>Pattern       | # Isoforms | # Protein Groups | # Proteins | # PSMs | Master<br>Protein<br>Accessions | Positions<br>in Master<br>Proteins | Modifications<br>in Master Proteins  | # Missed Cleavages | Theo.<br>MH+ [Da] | Confidence<br>(by Search Engine):<br>Sequest HT | XCorr (by Search Engine): Se-<br>quest HT | Sequence<br>in Protein     | Positions<br>in Proteins |
|------------------------------------------------------------------------|-------------------------|-------------------------------|------------|------------------|------------|--------|---------------------------------|------------------------------------|--------------------------------------|--------------------|-------------------|-------------------------------------------------|-------------------------------------------|----------------------------|--------------------------|
| [S].GRESSTPNGTSVPRNSSRTDG.[T]                                          |                         | -----                         | 1          | 1                | 1          | 2      | AFV53359.1                      | AFV53359.1<br>[187-207]            |                                      | 0                  | 2162.01807        | High                                            | 3.55                                      | S.GRESSTPNGTSVPRNSSRTDG.T  | [187-207]                |
| [S].GRESSTPNGTSVPRNSSRTDG.[T]                                          | 1xPhospho [T/S]         | positions not distinguishable | 2          | 1                | 1          | 3      | AFV53359.1                      | AFV53359.1<br>[187-207]            |                                      | 0                  | 2241.98441        | High                                            | 2.66                                      | S.GRESSTPNGTSVPRNSSRTDG.T  | [187-207]                |
| [S].GRESSTPNGTSVPRNSSRTDG.[T]                                          | 1xPhospho<br>[S4(98.9)] | ---*-----                     | 2          | 1                | 1          | 1      | AFV53359.1                      | AFV53359.1<br>[187-207]            | AFV53359.1<br>1xPhospho [S190(98.9)] | 0                  | 2241.98441        | High                                            | 2.68                                      | S.GRESSTPNGTSVPRNSSRTDG.T  | [187-207]                |
| [S].GRESSTPNGTSVPRNSSRTDGT.[W]                                         |                         | -----                         | 1          | 1                | 1          | 1      | AFV53359.1                      | AFV53359.1<br>[187-208]            |                                      | 0                  | 2263.06575        | High                                            | 3.04                                      | S.GRESSTPNGTSVPRNSSRTDGT.W | [187-208]                |
| [S].QFTDEEYR.[F]                                                       |                         | -----                         | 1          | 1                | 1          | 1      | AFV53359.1                      | AFV53359.1<br>[255-262]            |                                      | 0                  | 1087.46908        | High                                            | 1.97                                      | S.QFTDEEYR.F               | [255-262]                |
| [S].QFTDEEYRF.[S]                                                      |                         | -----                         | 1          | 1                | 1          | 3      | AFV53359.1                      | AFV53359.1<br>[255-263]            |                                      | 0                  | 1234.53749        | High                                            | 2.42                                      | S.QFTDEEYRF.S              | [255-263]                |
| [S].QFTDEEYRFS.[S]                                                     |                         | -----                         | 1          | 1                | 1          | 3      | AFV53359.1                      | AFV53359.1<br>[255-264]            |                                      | 0                  | 1321.56952        | High                                            | 2.53                                      | S.QFTDEEYRFS.S             | [255-264]                |
| [S].QFTDEEYRFSS.[F]                                                    |                         | -----                         | 1          | 1                | 1          | 2      | AFV53359.1                      | AFV53359.1<br>[255-265]            |                                      | 0                  | 1408.60155        | High                                            | 2.63                                      | S.QFTDEEYRFSS.F            | [255-265]                |
| [S].QFTDEEYRFSSF.[T]                                                   |                         | -----                         | 1          | 1                | 1          | 1      | AFV53359.1                      | AFV53359.1<br>[255-266]            |                                      | 0                  | 1555.66996        | High                                            | 2.55                                      | S.QFTDEEYRFSSF.T           | [255-266]                |
| [S].QFTDEEYRFSSFTTPKTPPAF.-                                            |                         | -----                         | 1          | 1                | 1          | 13     | AFV53359.1                      | AFV53359.1<br>[255-275]            |                                      | 0                  | 2496.17178        | High                                            | 4.13                                      | S.QFTDEEYRFSSFTTPKTPPAF.-  | [255-275]                |
| [S].QFTDEEYRFSSFTTPKTPPAF.-                                            | 1xPhospho [S/T/Y]       | positions not distinguishable | 1          | 1                | 1          | 2      | AFV53359.1                      | AFV53359.1<br>[255-275]            |                                      | 0                  | 2576.13811        | High                                            | 2.45                                      | S.QFTDEEYRFSSFTTPKTPPAF.-  | [255-275]                |
| [S].SFTTPKTPPAF.-                                                      |                         | -----                         | 1          | 1                | 1          | 1      | AFV53359.1                      | AFV53359.1<br>[265-275]            |                                      | 0                  | 1193.6201         | High                                            | 2.91                                      | S.SFTTPKTPPAF.-            | [265-275]                |
| [F].SSFTTPKTPPAF.-                                                     |                         | -----                         | 1          | 1                | 1          | 1      | AFV53359.1                      | AFV53359.1<br>[264-275]            |                                      | 0                  | 1280.65213        | High                                            | 2.69                                      | F.SSFTTPKTPPAF.-           | [264-275]                |
| [F].TDEEYRFSSFTTPKTPPAF.-                                              |                         | -----                         | 1          | 1                | 1          | 2      | AFV53359.1                      | AFV53359.1<br>[257-275]            |                                      | 0                  | 2221.04479        | High                                            | 3.66                                      | F.TDEEYRFSSFTTPKTPPAF.-    | [257-275]                |



**Table S3.** Primers used in this study.

| name             | Sequence (5'-3')                       |
|------------------|----------------------------------------|
| S191A-Fw         | CAGGAAGAGAATCCGCCACACCCAATGGAACC       |
| S191A-Rv         | GGTTCATTGGGTGTGGCGGATTCTCTTCCTG        |
| S191D-Fw         | CAGGAAGAGAATCCGACACACCCAATGGAACC       |
| S191D-Rv         | GGTTCATTGGGTGTGTGCGGATTCTCTTCCTG       |
| S203A-Fw         | CCAGTGTACCTAGAAATTCTGCCAGAACGGATGGCACC |
| S203A-Rv         | GGTGCCATCCGTTCTGGCAGAATTTCTAGGTACACTGG |
| S203D-Fw         | CCAGTGTACCTAGAAATTCTGACAGAACGGATGGCACC |
| S203D-Rv         | GGTGCCATCCGTTCTGTGAGAATTTCTAGGTACACTGG |
| S265A-Fw         | GGAATACAGATTCTCCGCCTTCACCACCCCG        |
| S265A-Rv         | CGGGGTGGTGAAGGCGGAGAATCTGTATTCC        |
| S265D-Fw         | GGAATACAGATTCTCCGACTTCACCACCCCG        |
| S265D-Rv         | CGGGGTGGTGAAGTCGGAGAATCTGTATTCC        |
| NCCR_GGAA_F<br>w | GCTAGGAGCCCCAAGAATCTGCCAACTTG          |
| NCCR_GGAA_R<br>v | CAAGTTGGCAGATTCTTGGGGCTCCTAGC          |

## References

1. Kwun, H.J.; Chang, Y.; Moore, P.S. Protein-mediated viral latency is a novel mechanism for Merkel cell polyomavirus persistence. *Proc. Natl. Acad. Sci. USA* **2017**, *114*, E4040-e4047.
2. Nwogu, N.; Ortiz, L.E.; Kwun, H.J. Merkel Cell Polyomavirus Large T Antigen Unique Domain Regulates Its Own Protein Stability and Cell Growth. *Viruses* **2020**, *12*, 1043.
3. Schrama, D.; Hesbacher, S.; Angermeyer, S.; Schlosser, A.; Haferkamp, S.; Aue, A.; Adam, C.; Weber, A.; Schmidt, M.; Houben, R. Serine 220 phosphorylation of the Merkel cell polyomavirus large T antigen crucially supports growth of Merkel cell carcinoma cells. *Int. J. Cancer* **2016**, *138*, 1153-62.
4. Liu, X.; Hein, J.; Richardson, S.C.; Basse, P.H.; Toptan, T.; Moore, P.S.; Gjoerup, O.V.; Chang, Y. Merkel cell polyomavirus large T antigen disrupts lysosome clustering by translocating human Vam6p from the cytoplasm to the nucleus. *J. Biol. Chem.* **2011**, *286*, 17079-90.
5. Alvarez Orellana, J.; Kwun, H.J.; Artusi, S.; Chang, Y.; Moore, P.S. Sirolimus and Other Mechanistic Target of Rapamycin Inhibitors Directly Activate Latent Pathogenic Human Polyomavirus Replication. *J. Infect. Dis.* **2021**, *224*, 1160-1169.
6. Diaz, J.; Wang, X.; Tsang, S.H.; Jiao, J.; You, J. Phosphorylation of large T antigen regulates Merkel cell polyomavirus replication. *Cancers (Basel)* **2014**, *6*, 1464-86.
7. Li, J.; Diaz, J.; Wang, X.; Tsang, S.H.; You, J. Phosphorylation of Merkel cell polyomavirus large tumor antigen at serine 816 by ATM kinase induces apoptosis in host cells. *J. Biol. Chem.* **2015**, *290*, 1874-84.
